# Supplementary material for: A direct Z -scheme heterojunction of CsPbBr 3 /SnS 2 nanosheets for visible light-driven photocatalytic CO 2 reduction
Source: Royal Society of Chemistry journal article supplement (doi:10.1039/d5ta08691d), 2025-12-09
Supplement: d5ta08691d1.pdf [file d5ta08691d1.pdf]

## **Direct Z-scheme Heterojunction of CsPbBr<sub>3</sub>/SnS<sub>2</sub> Nanosheets for Visible Light-Driven Photocatalytic CO<sub>2</sub> Reduction**

Li-Yuan Wu,<sup>a</sup> Fei Zhang,<sup>a</sup> Ming-zhe Cai,<sup>a</sup> Min Zhang,<sup>b</sup> Tong-Bu Lu,<sup>b</sup> Ping Li<sup>\*c</sup> and

Yong-Hua Chen<sup>\*a,c</sup>

<sup>a</sup> Henan Institute of Flexible Electronics (HIFE) and School of Flexible Electronics (SoFE), Henan University, 379 Mingli Road, Zhengzhou 450046, China

<sup>b</sup> MOE International Joint Laboratory of Materials Microstructure, Institute for New Energy Materials and Low Carbon Technologies, School of Materials Science and Engineering, Tianjin University of Technology, Tianjin 300384, China.

<sup>c</sup> State Key Laboratory of Flexible Electronics (LoFE) & Institution of Advanced Materials (IAM), School of Flexible Electronics (Future Technologies), Nanjing Tech University, Nanjing 211816, China.

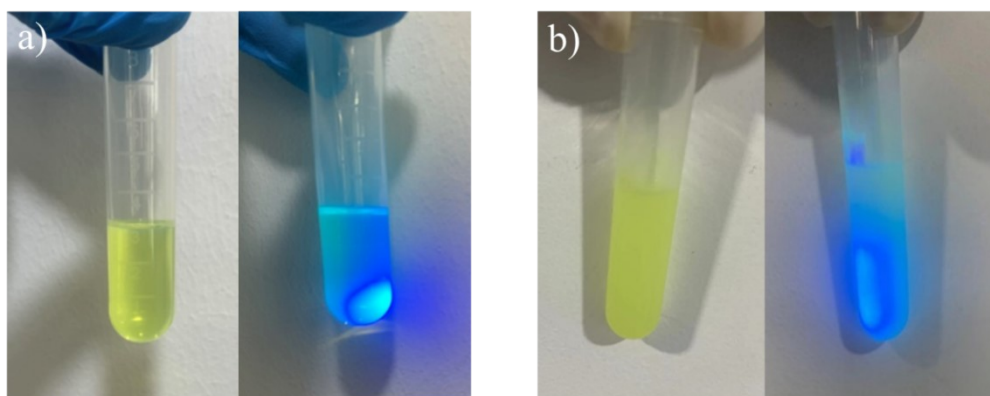

Figure S1 The photographic images of a)  $\text{CsPbBr}_3\text{-OA}$  nanosheets and b)  $\text{CsPbBr}_3$  nanosheets dispersed in hexane under room light (left) and excitation using an ultraviolet lamp under room temperature (right).

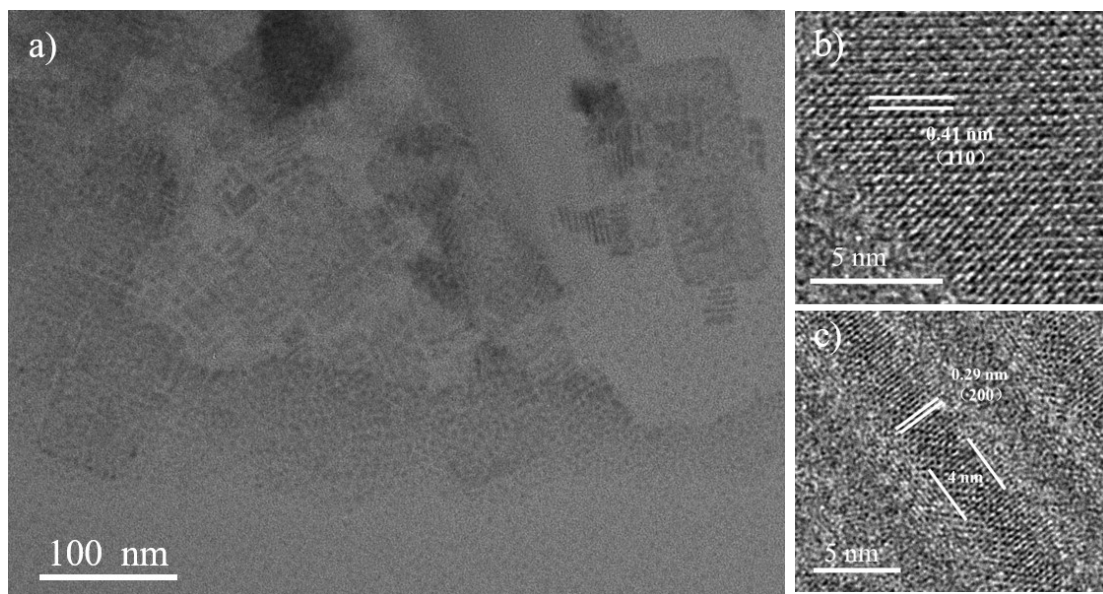

Figure S2 a) TEM image of CsPbBr<sub>3</sub>-OA nanosheets. b-c) HRTEM images and lattice spacing of CsPbBr<sub>3</sub>-OA nanosheets.

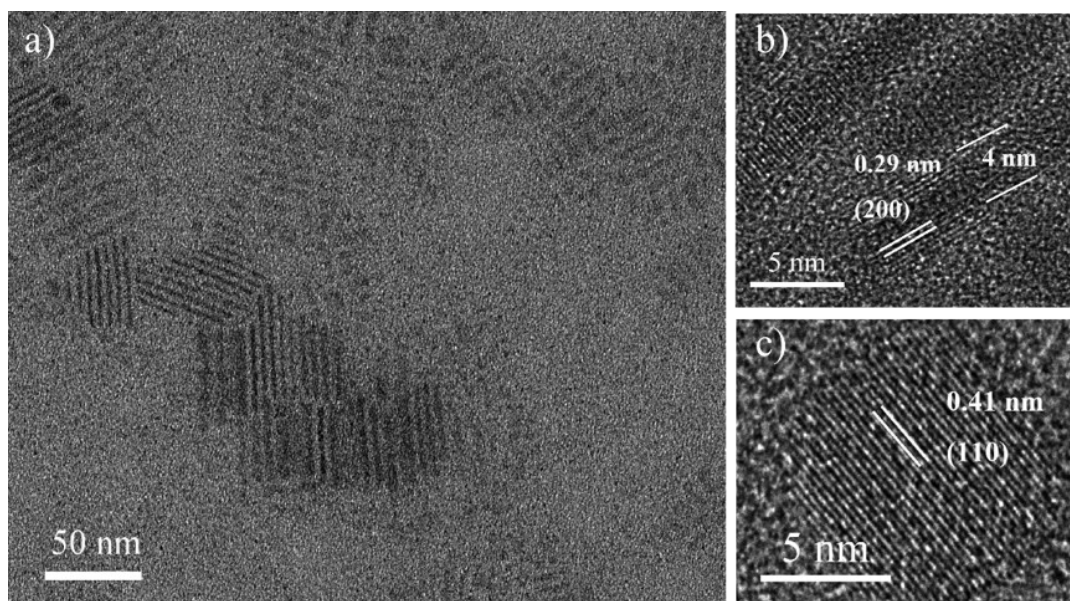

Figure S3 a) TEM image of  $\text{CsPbBr}_3$  nanosheets. b-c) HRTEM images and lattice spacing of  $\text{CsPbBr}_3$  nanosheets.

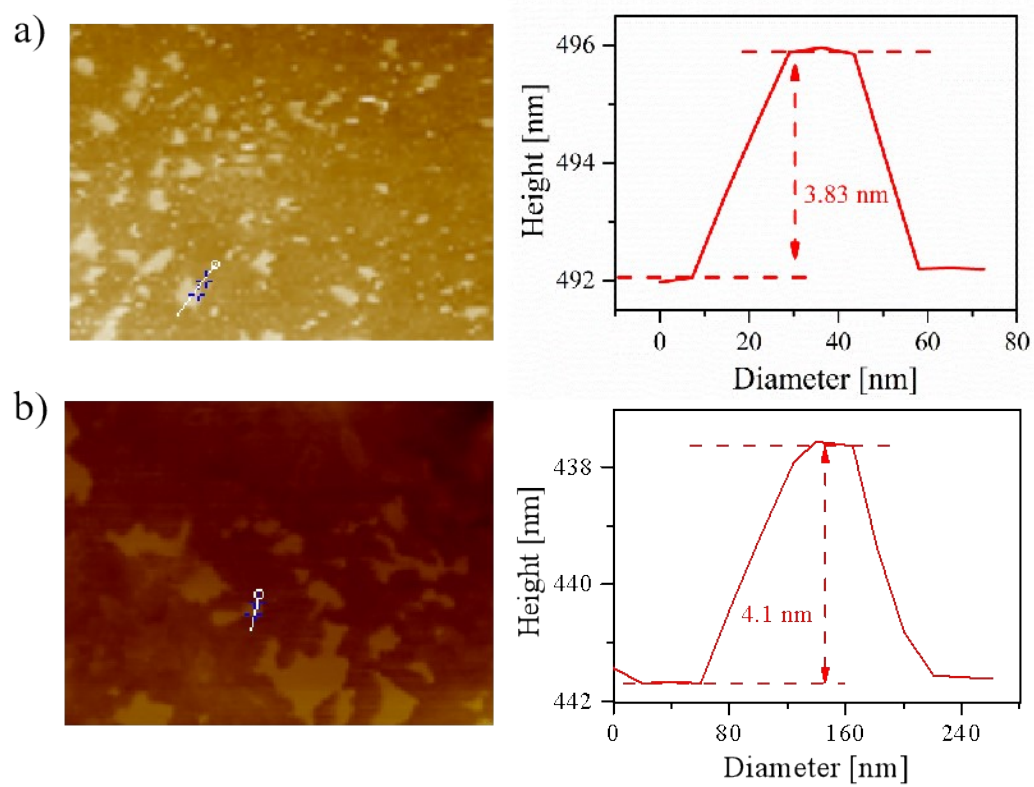

Figure S4 AFM images and corresponding height profiles of as prepared (a) CsPbBr<sub>3</sub> - OA nanosheets and (b) CsPbBr<sub>3</sub> nanosheets.

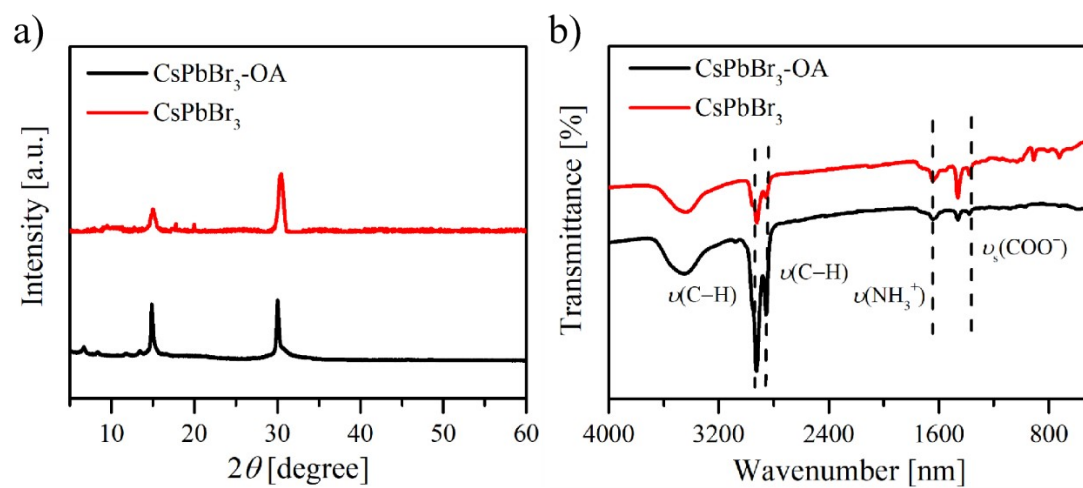

Figure S5 a) XRD patterns of CsPbBr<sub>3</sub>-OA nanosheets and CsPbBr<sub>3</sub> nanosheets. b) IR spectrum of CsPbBr<sub>3</sub>-OA nanosheets and CsPbBr<sub>3</sub> nanosheets.

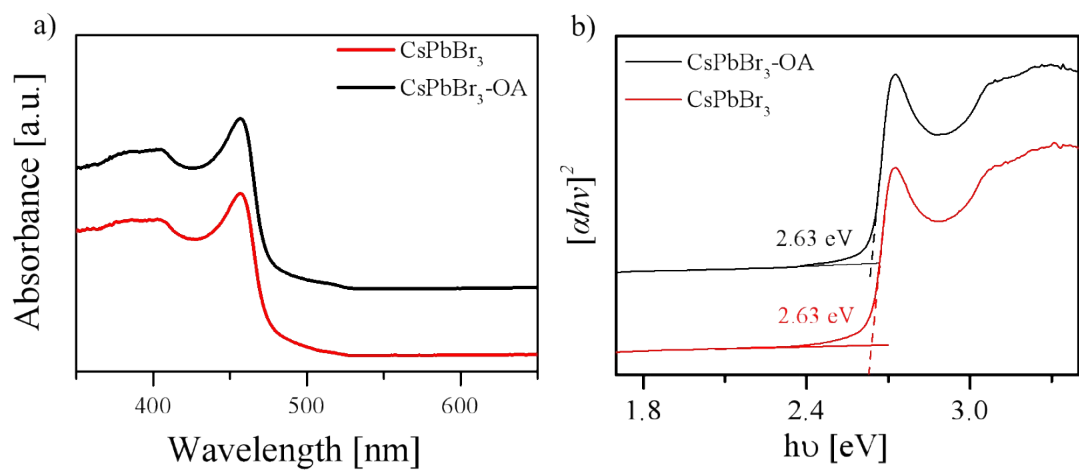

Figure S6 a) The UV-Vis absorption spectra of CsPbBr<sub>3</sub>-OA nanosheets and CsPbBr<sub>3</sub> nanosheets. b) The Tauc plots of CsPbBr<sub>3</sub>-OA nanosheets and CsPbBr<sub>3</sub> nanosheets.

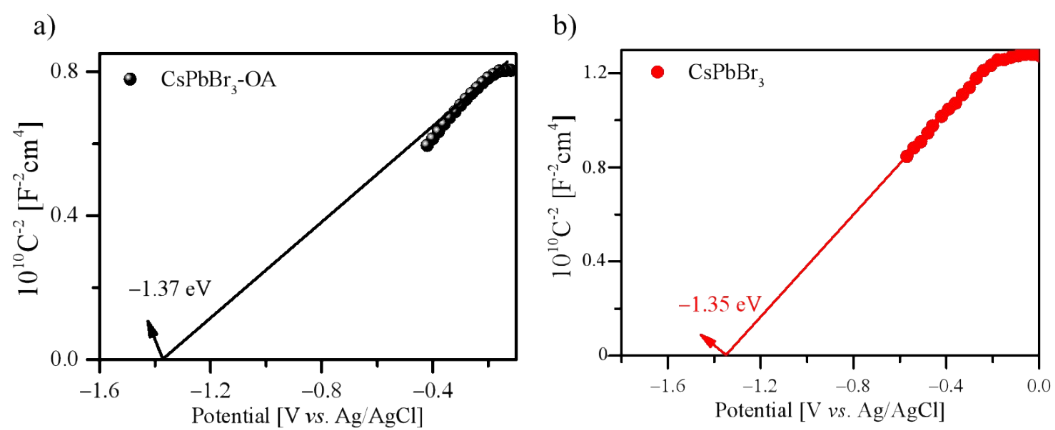

Figure S7 a) The UV-Vis absorption spectra of CsPbBr<sub>3</sub>-OA nanosheets and CsPbBr<sub>3</sub> nanosheets. b) The Tanuc plots of CsPbBr<sub>3</sub>-OA nanosheets and CsPbBr<sub>3</sub> nanosheets.



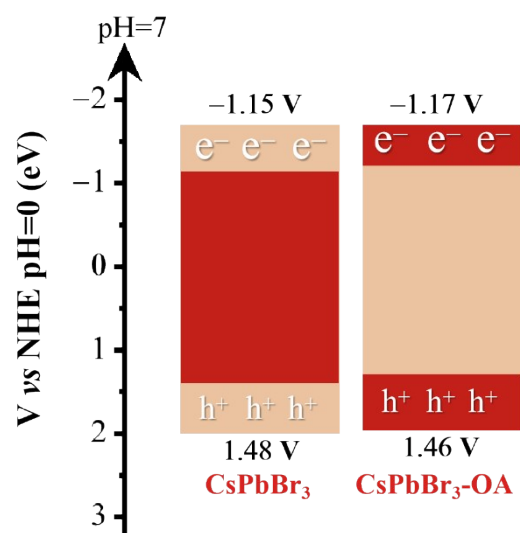

Figure S8 The band alignment of  $\text{CsPbBr}_3\text{-OA}$  nanosheets and  $\text{CsPbBr}_3$  nanosheets.

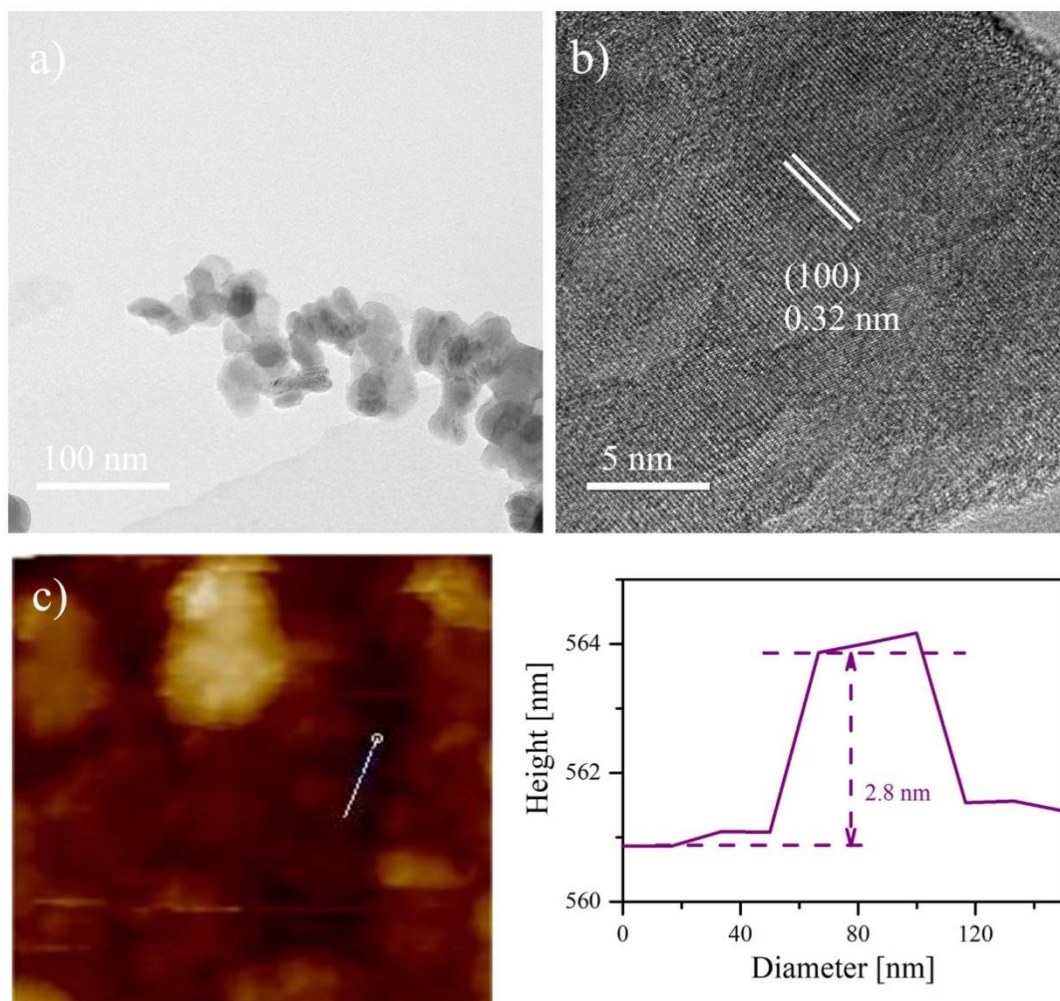

Figure S9 a) TEM, b) HRTEM images with lattice spacing of as prepared SnS<sub>2</sub> nanosheets. c) AFM image and corresponding height profiles of as prepared SnS<sub>2</sub> nanosheets.

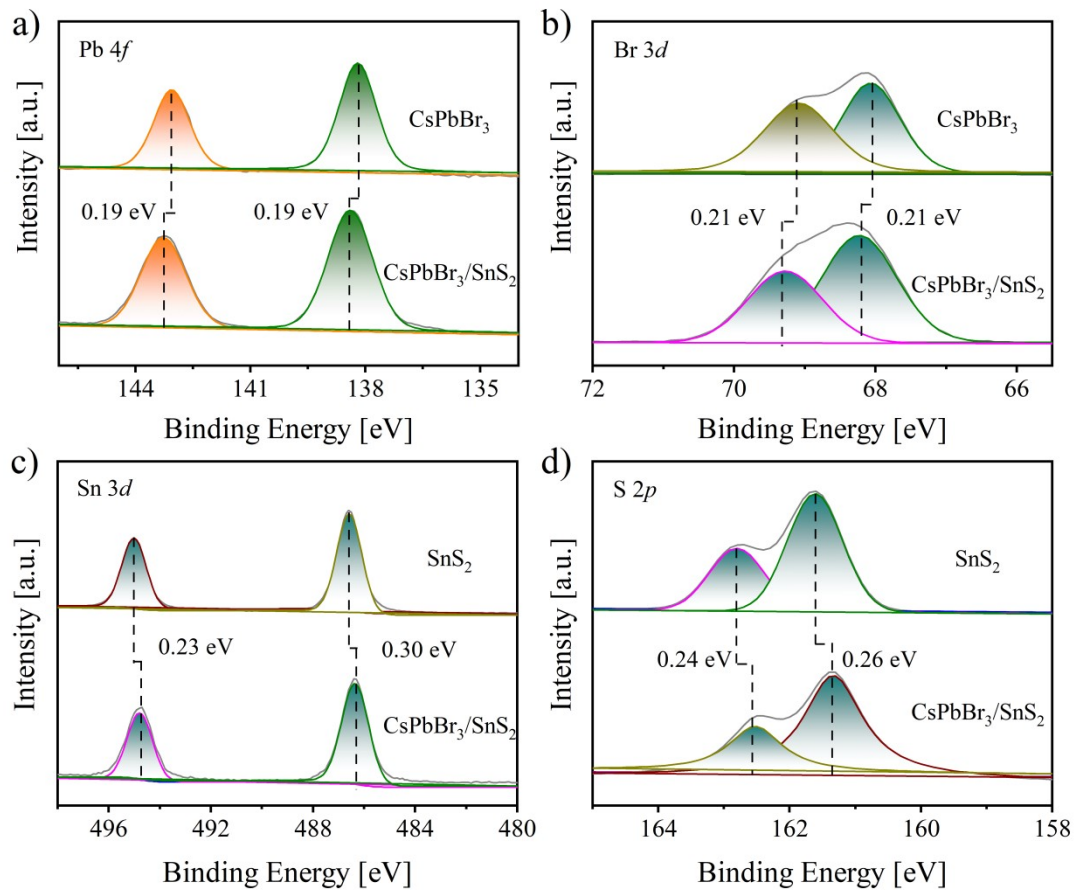

Figure S10 High-resolution XPS spectra of CsPbBr<sub>3</sub>/SnS<sub>2</sub> composites in the dark (a) Pb 4f, (b) Br 3d, (c) Sn 3d and (d) S 2p.

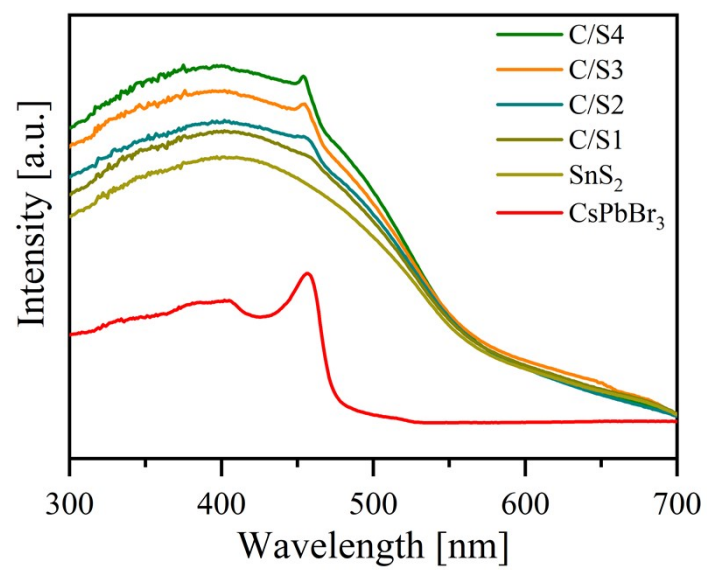

Figure S11 UV-Vis DRS spectra of S/Cx heterojunctions.

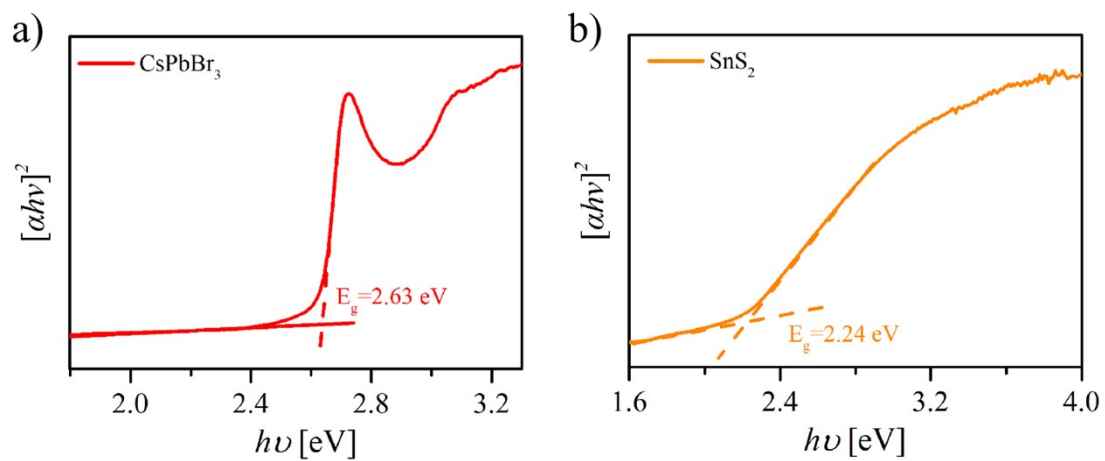

Figure S12 Tauc plots of CsPbBr<sub>3</sub> nanosheets and SnS<sub>2</sub> nanosheets.

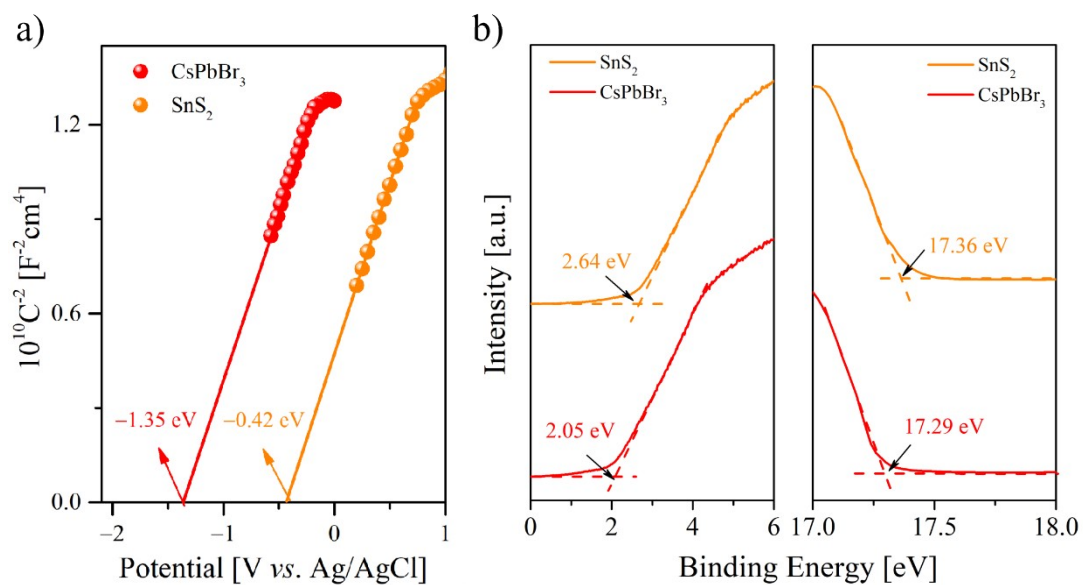

Figure S13 a) The Mott-Schottky plots and b) UPS spectras of  $SnS_2$  nanosheets and  $CsPbBr_3$  nanosheets.

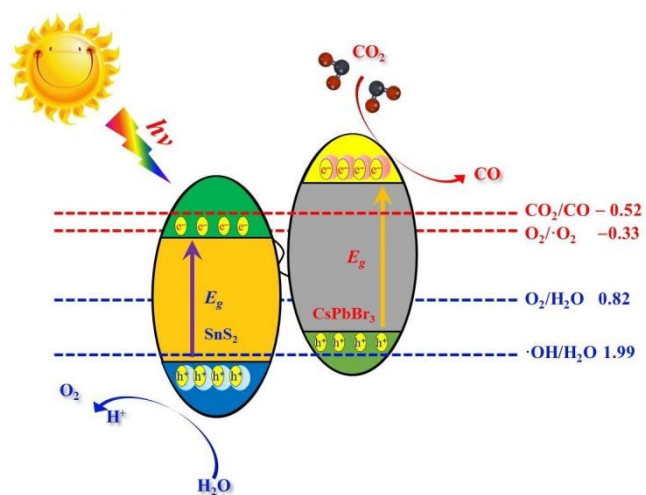

Figure S14 The band alignment of CsPbBr<sub>3</sub> nanosheets and SnS<sub>2</sub> nanosheets.

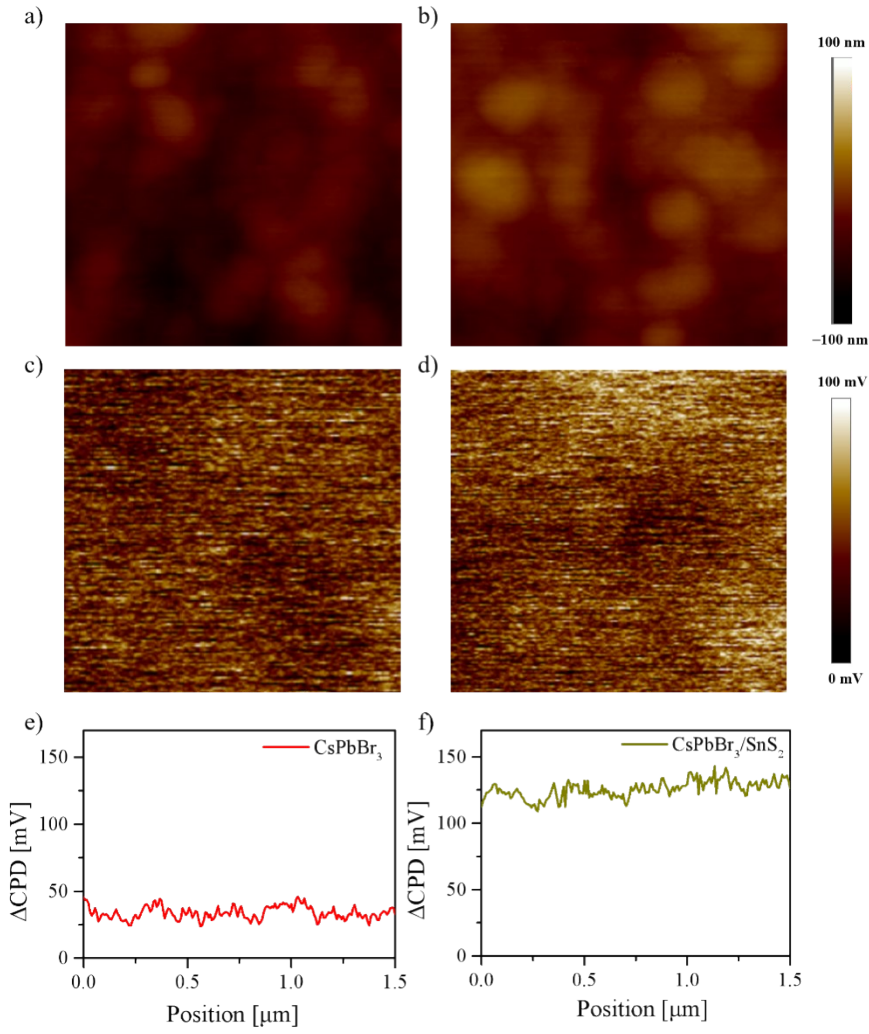

Figure S15 Height images of a) CsPbBr<sub>3</sub> and b) S/C2 heterojunctions. The differential surface photovoltage (SPV) images of c) CsPbBr<sub>3</sub> and d) S/C2 heterojunctions between potential images under illumination. Contact potential difference changes ( $\Delta\text{CPD}$ ) of e) CsPbBr<sub>3</sub> and f) S/C2 heterojunctions by subtracting the potential in the dark conditions from that under illumination.



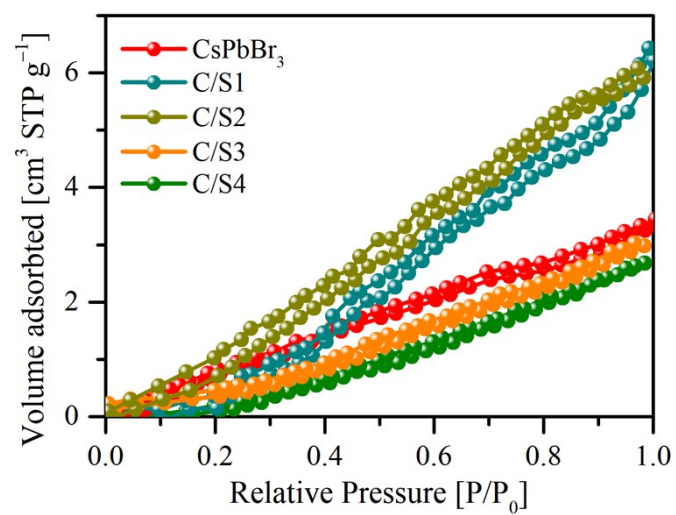

Figure S16 Carbon dioxide adsorption-desorption isotherm (BET) of CsPbBr<sub>3</sub>/SnS<sub>2</sub> heterojunctions.

Table S1 Multi-exponential fitting parameters for the PL decays of CsPbBr<sub>3</sub>/SnS<sub>2</sub> heterojunctions (Figure 3d). Excitation at 410 nm and detection at 460 nm.

| Smamples            | $\tau_1$ [ns]<br>(A <sub>1</sub> ) | $\tau_2$ [ns]<br>(A <sub>2</sub> ) | $\tau_3$ [ns]<br>(A <sub>3</sub> ) | $\tau_{Ave}$ [ns] |
|---------------------|------------------------------------|------------------------------------|------------------------------------|-------------------|
| CsPbBr <sub>3</sub> | 0.77<br>(31.69%)                   | 3.08<br>(46.16%)                   | 9.56<br>(22.15%)                   | 3.77              |
| C/S1                | 0.48<br>(37.98%)                   | 3.73<br>(37.51%)                   | 25.38<br>(24.51%)                  | 7.80              |
| C/S2                | 1.91<br>(15.04%)                   | 8.45<br>(42.54%)                   | 36.43<br>(42.43%)                  | 19.34             |
| C/S3                | 0.79<br>(20.81%)                   | 5.41<br>(41.64%)                   | 32.88<br>(37.55%)                  | 14.77             |
| C/S4                | 1.11<br>(17.72%)                   | 5.97<br>(47.75%)                   | 28.11<br>(34.53%)                  | 12.75             |

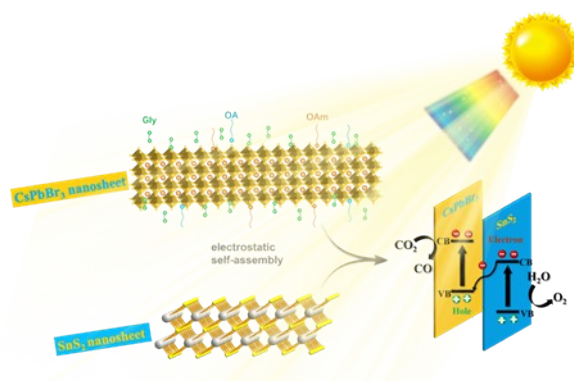

CsPbBr<sub>3</sub>/SnS<sub>2</sub> Z-scheme heterojunctions were subtly constructed for visible-light-driven CO<sub>2</sub>-to-CO conversion. This dual-nanosheet assembly is bonded via electrostatic attraction and exhibits excellent performance for CO<sub>2</sub> reduction to CO. The atomic-scale proximity in the 2D/2D architecture ensures efficient interfacial Z-scheme charge transfer.
